# Supplementary material for: Controlled synthesis and up/down-conversion luminescence of self-assembled hierarchical architectures of monoclinic AgRE(WO4)2:Ln3+(RE = Y, La, Gd, Lu; Ln = Eu, Tb, Sm, Dy, Yb/Er, Yb/Tm)
Source: Royal Society of Chemistry journal article supplement (doi:10.1039/c3tc31880j), 2013-11-01
Supplement: c3tc31880j.pdf [file c3tc31880j.pdf]

# Supporting Information

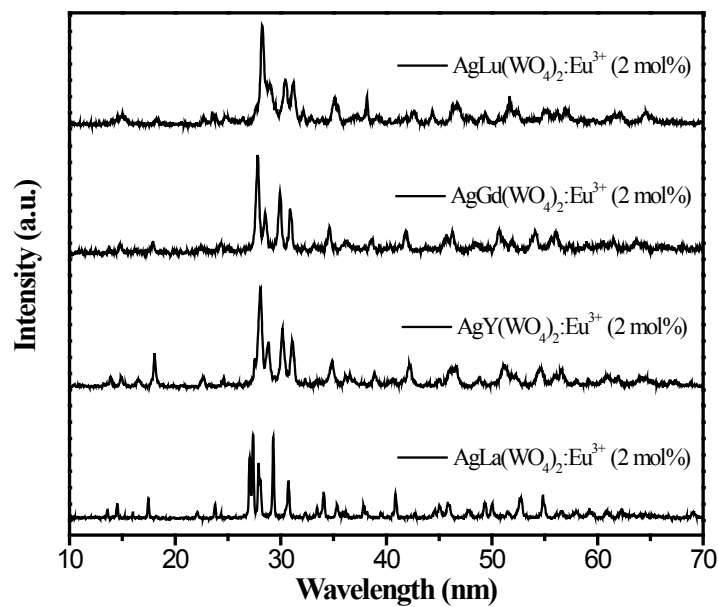

**Figure S1** The XRD patterns of AgRE(WO<sub>4</sub>)<sub>2</sub>:Eu<sup>3+</sup> (2 mol %) (RE = La, Y, Gd, Lu) samples

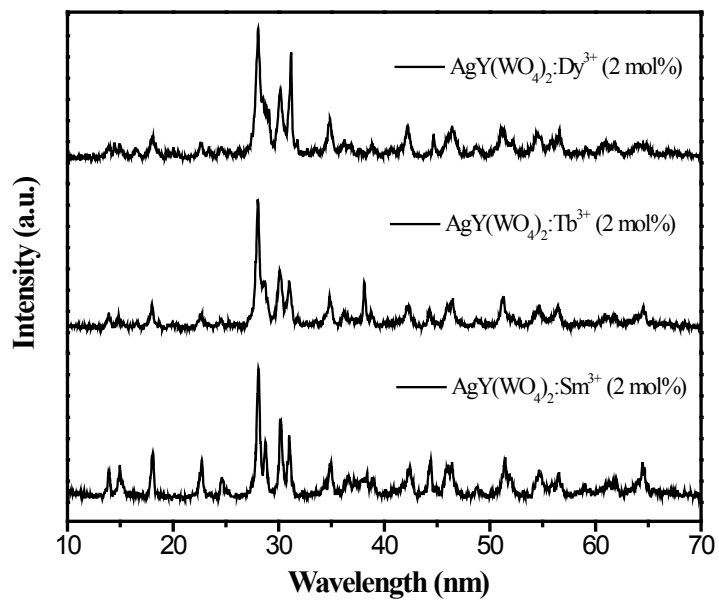

**Figure S2** The XRD patterns of  $\text{AgY}(\text{WO}_4)_2:\text{Ln}^{3+}$  (2 mol %) (Ln = Sm, Tb, Dy) samples

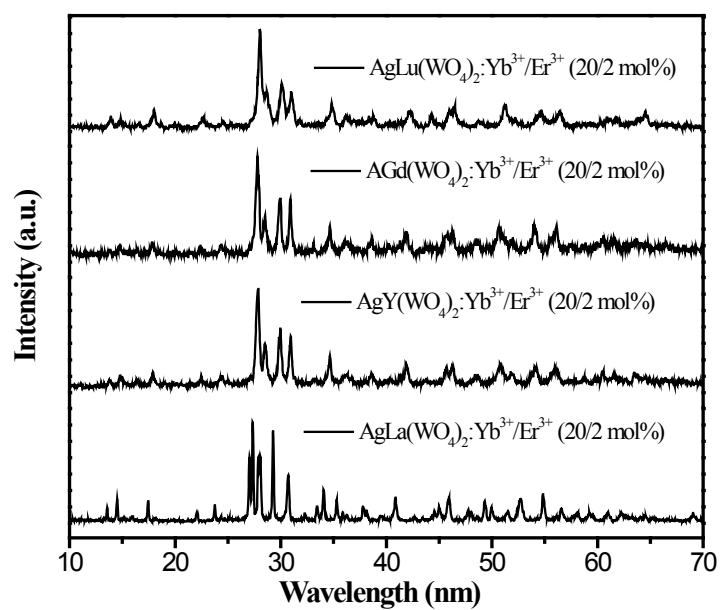

**Figure S3** The XRD patterns of AgRE(WO<sub>4</sub>)<sub>2</sub>:Yb<sup>3+</sup>/Er<sup>3+</sup> (2 mol %) (RE = La, Y, Gd, Lu) samples

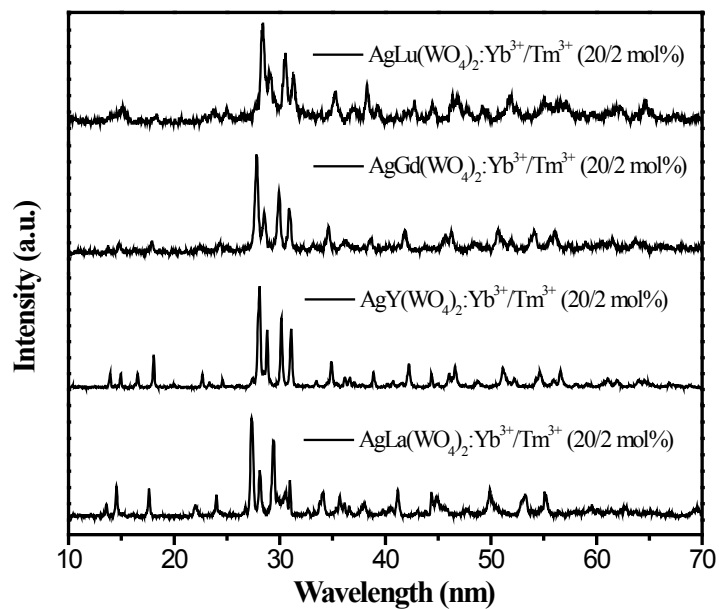

**Figure S4** The XRD patterns of  $\text{AgRE}(\text{WO}_4)_2:\text{Yb}^{3+}/\text{Tm}^{3+}$  (2 mol %) (RE = La, Y, Gd, Lu) samples

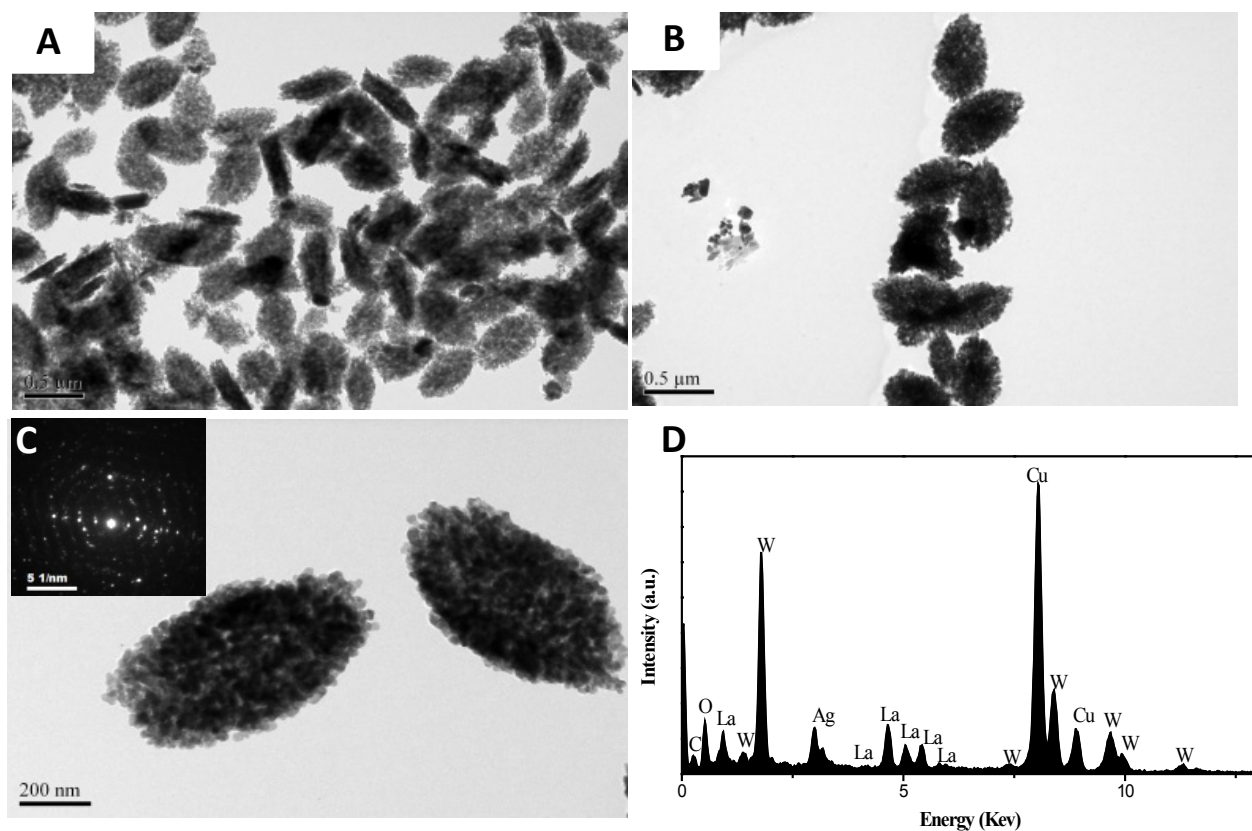

**Figure S5** TEM images, SAED and EDS patterns of the  $\text{AgLa}(\text{WO}_4)_2$ . (A)-(C) TEM images with different magnification of the hierarchical ellipsoids (the inset of C is the corresponding SAED pattern); (D) EDS spectrum.

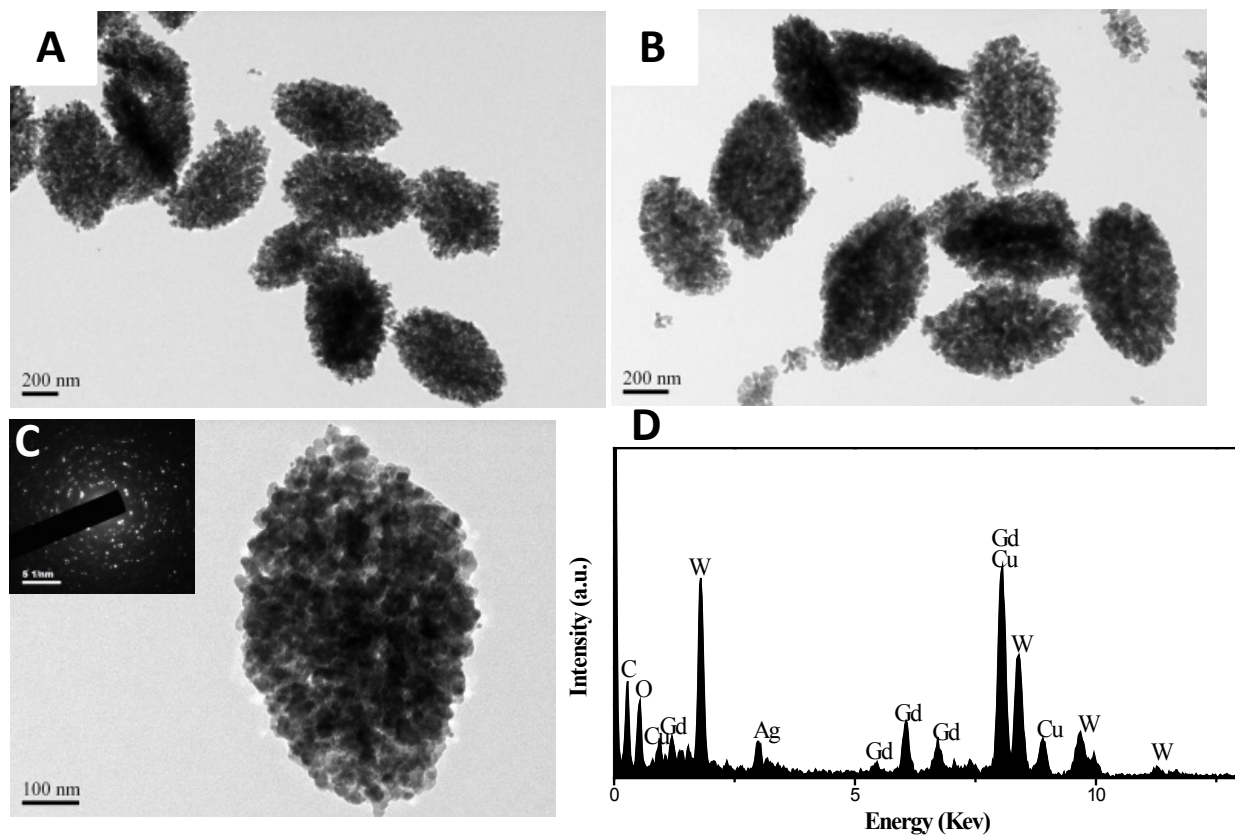

**Figure S6** TEM images, SAED and EDS patterns of the  $\text{AgGd}(\text{WO}_4)_2:\text{Eu}^{3+}$ . (A), (B) Typical TEM images of the product; (C) A detailed view of an individual hierarchical ellipsoid (the inset is the corresponding SEAD pattern); (D) EDS spectrum.

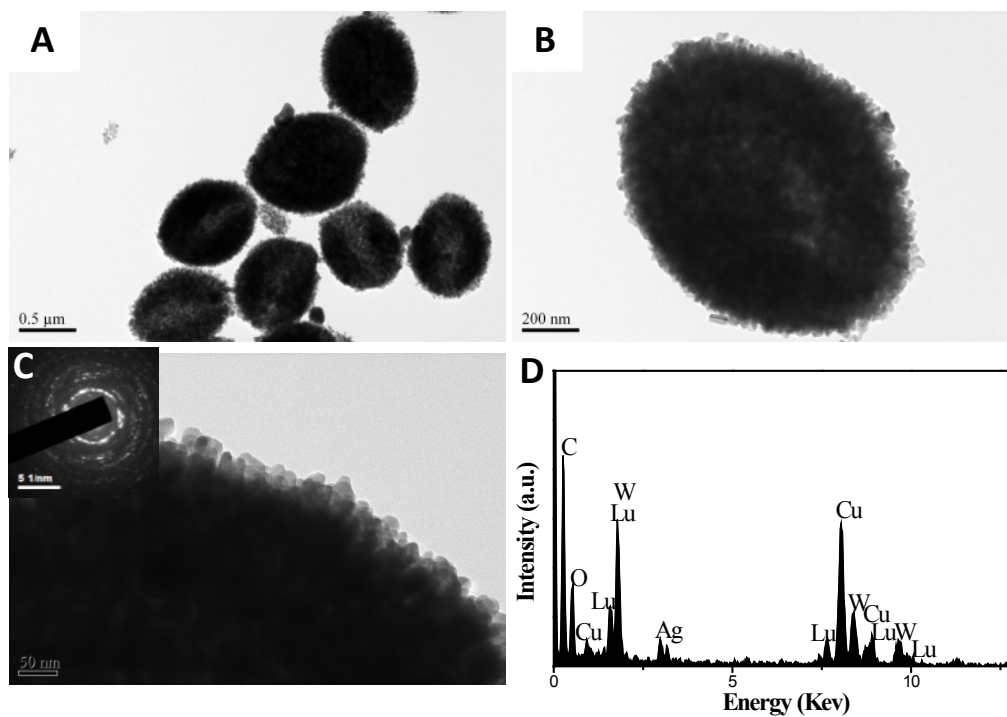

**Figure S7** TEM images, SAED and EDS patterns of  $\text{AgLu}(\text{WO}_4)_2$ . (A) An representative TEM image of the as-obtained hierarchical architectures; (B) A detailed view of an individual sphere; (C) TEM image of the fringe of an individual microsphere (the inset is the SEAD pattern performed on the microcrystal shown in B); (D) The EDS pattern taken from (C).

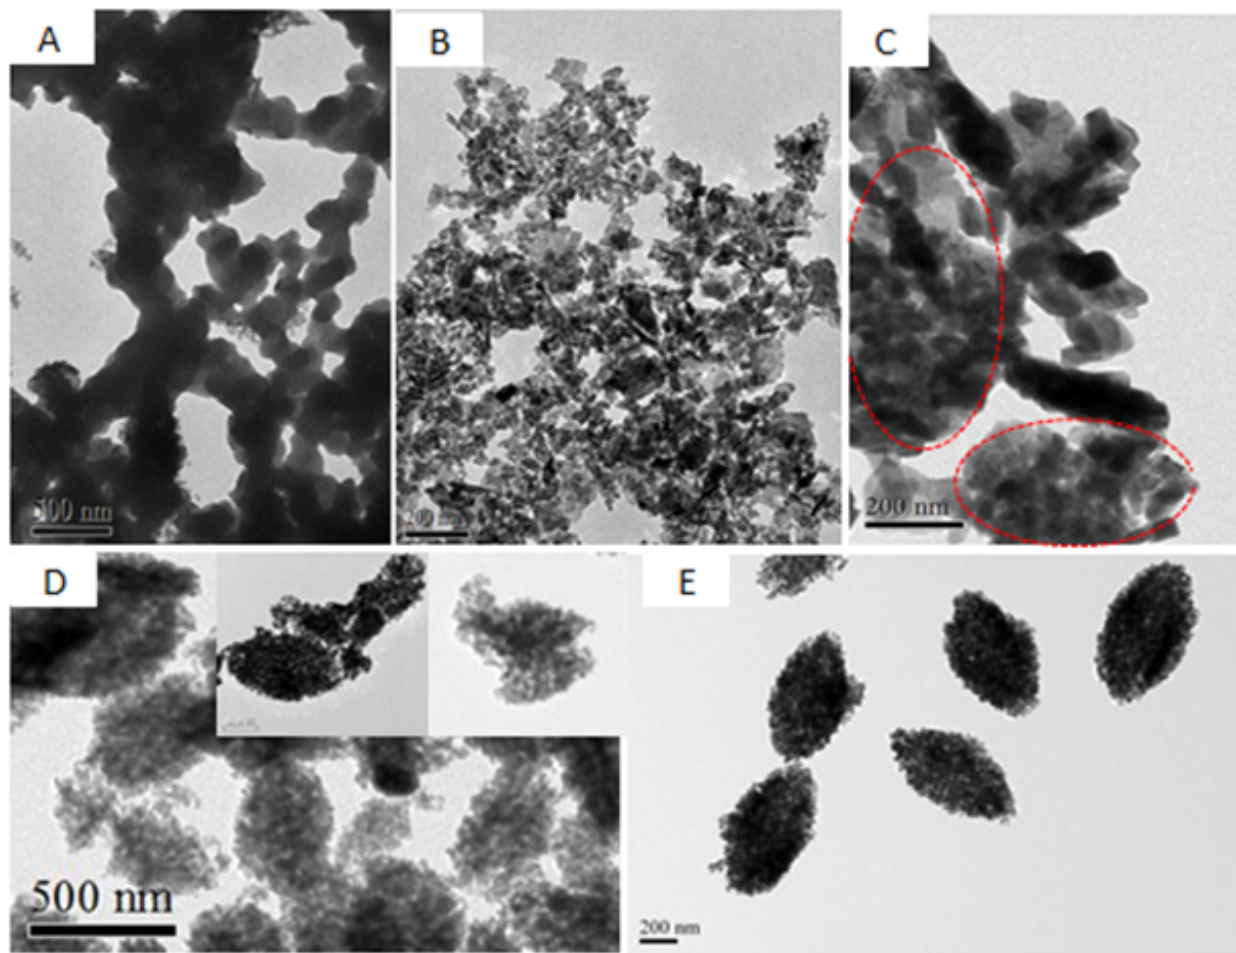

**Figure S8** TEM images of  $\text{AgY}(\text{WO}_4)_2$  collected at different reaction time in PVP-presence system: (A) Before hydrothermal treatment, (B) 2 hrs, (C) 4 hrs, (D) 8 hrs, (E) 48 hrs.



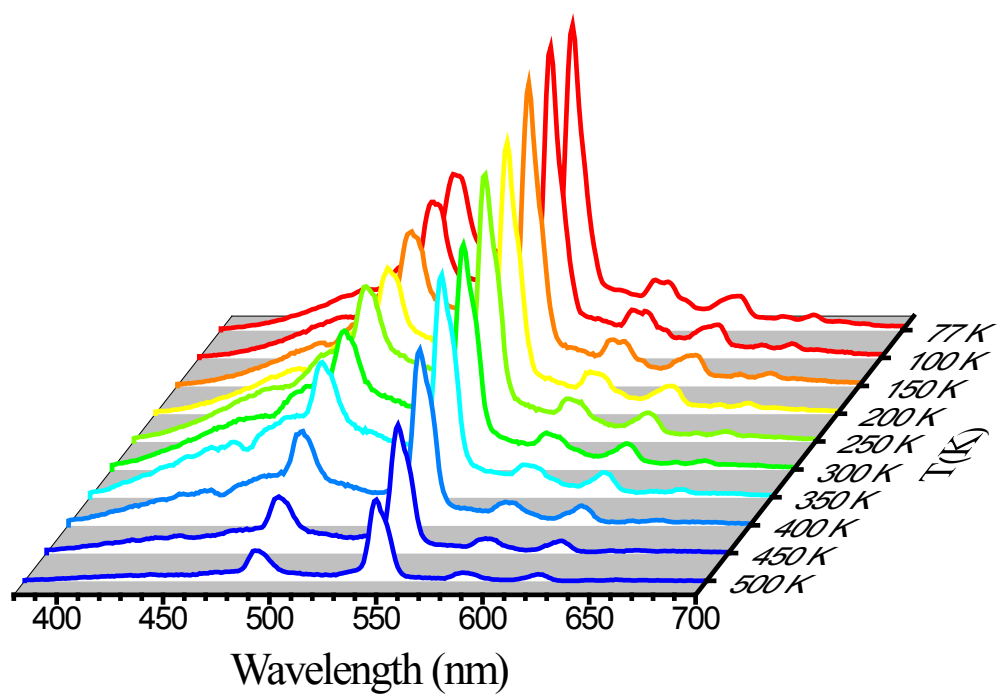

**Figure S9.** Temperature-dependent emission spectra ( $\lambda_{\text{ex}} = 266 \text{ nm}$ ) of AgY(WO<sub>4</sub>)<sub>2</sub>:Tb (2 mol%).

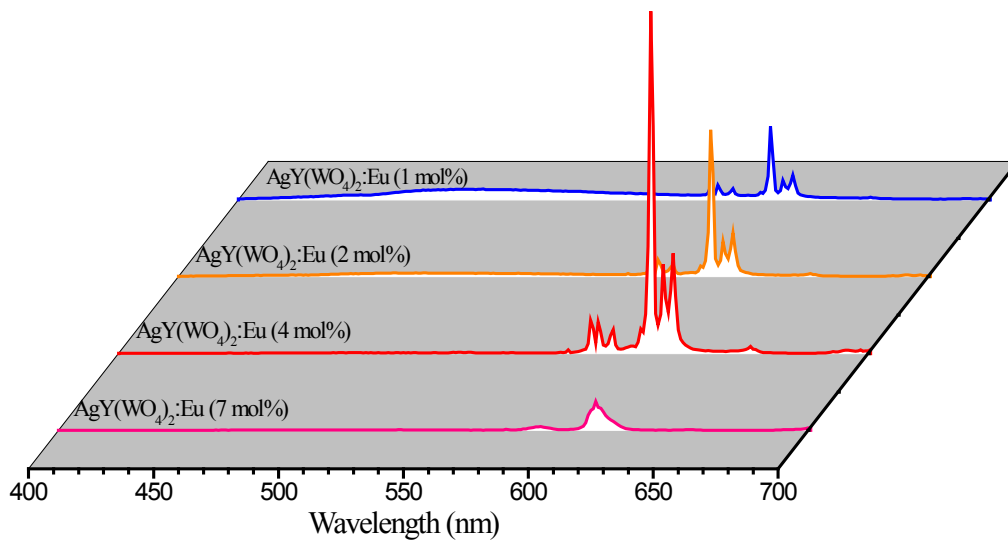

**Figure S10** The emission spectra ( $\lambda_{\text{ex}} = 278 \text{ nm}$ ) of  $\text{AgY}(\text{WO}_4)_2:\text{Eu}^{3+}$  with various  $\text{Eu}^{3+}$  doping levels.

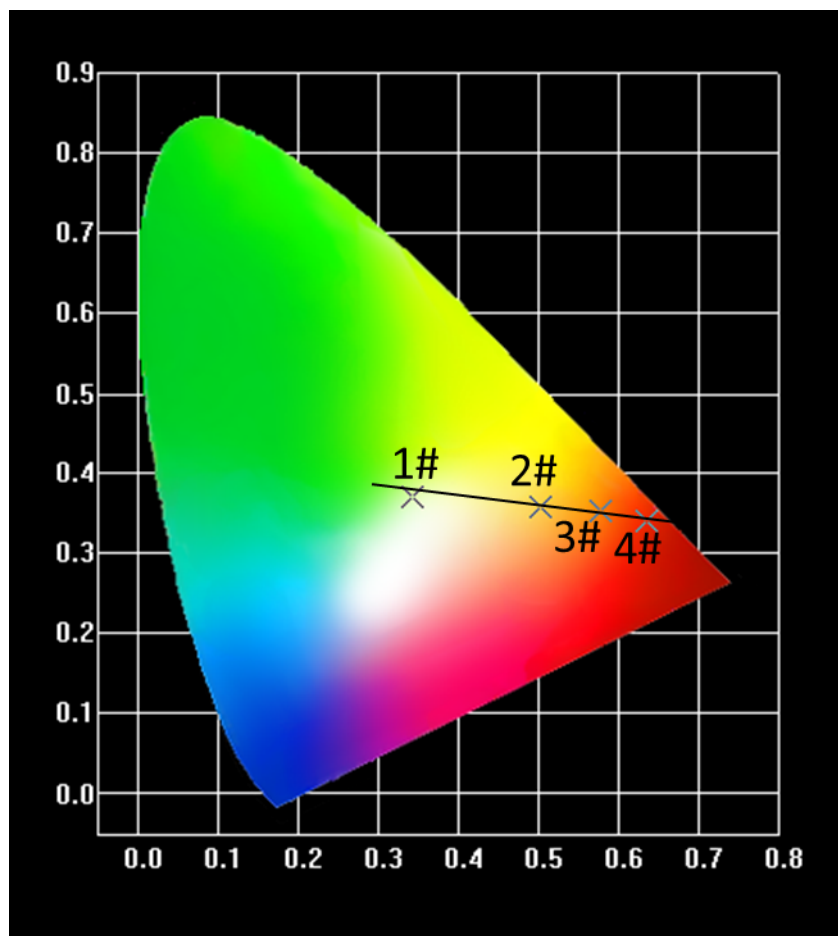

**Figure S11** The CIE chromaticity diagram of AgY(WO<sub>4</sub>)<sub>2</sub>:Eu<sup>3+</sup> (x mol %). (1) x = 1; (2) x = 2; (3) x = 4; (4) x = 7.
